# Supplementary material
Source: PubMed Central journal article supplement (PMC6083786)
Supplement: MD-009-C7MD00476A-s001.pdf [file MD-009-C7MD00476A-s001.pdf]

## Supplementary Figures

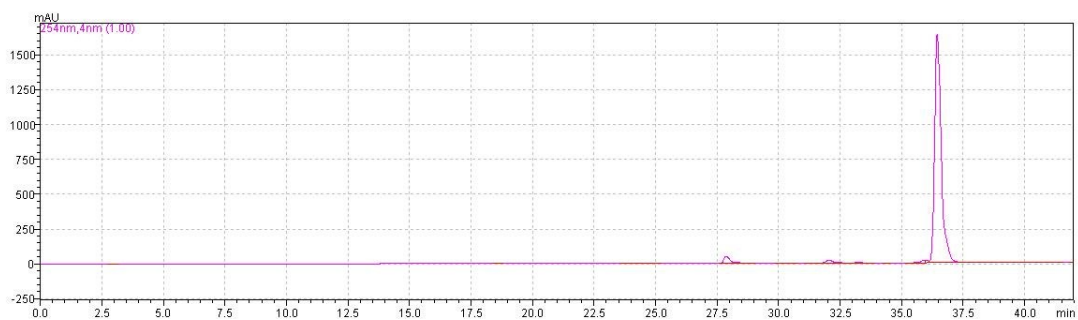

Figure S1. HPLC analysis chromatograms of chlordinaline

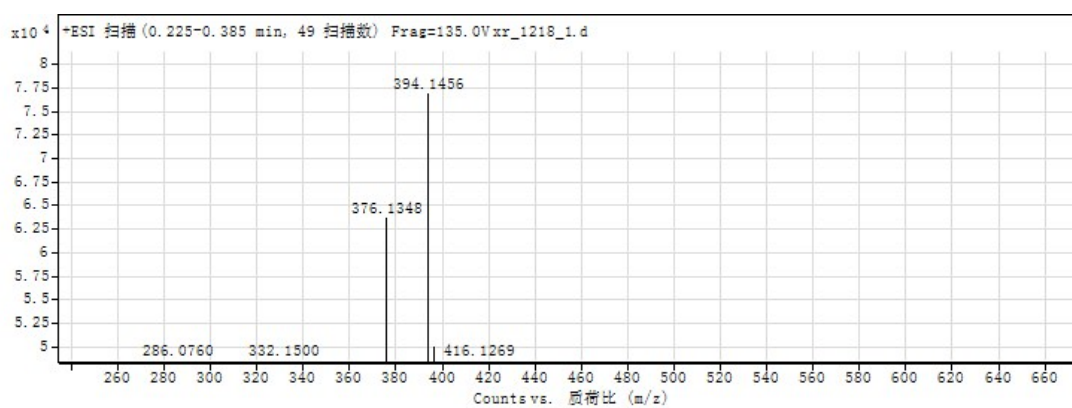

Figure S2. HRMS spectrum of chlordinaline

XR-7-95

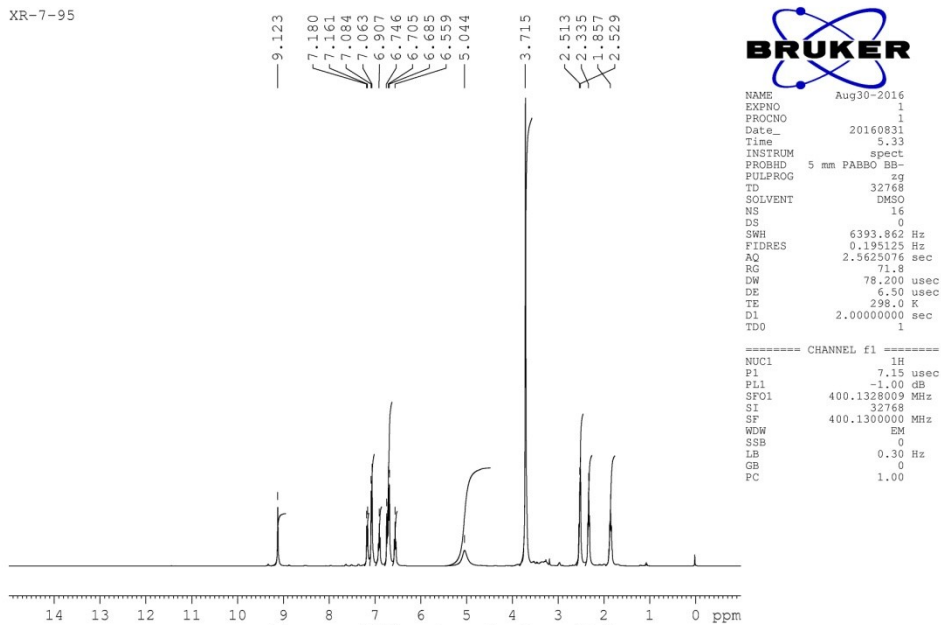

Figure S3. <sup>1</sup>H NMR spectrum of chlordinaline (400MHz, DMSO-d<sub>6</sub>)

XR-7-95

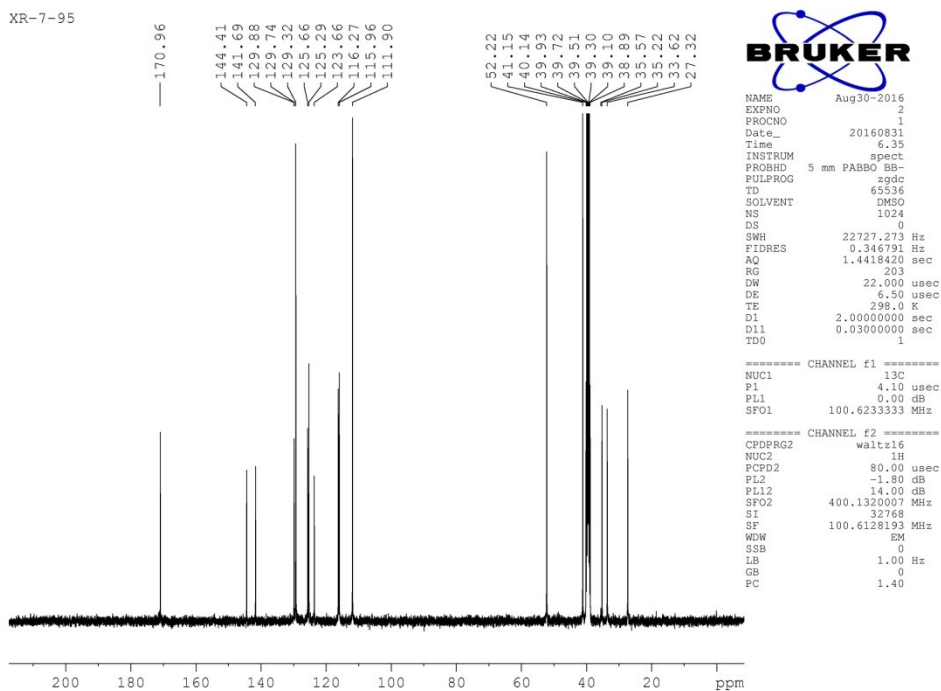

Figure S4. <sup>13</sup>C NMR spectrum of chlordinaline (400MHz, DMSO-d<sub>6</sub>)
